# Supplementary material
Source: PubMed Central journal article supplement (PMC6645735)
Supplement: ao7b01536_si_001.pdf [file ao7b01536_si_001.pdf]

## **Supporting Information**

*LC-MS/MS-Based Method for the Multiplex Detection of 24 Fentanyl Analogues and Metabolites in Whole Blood at Sub ng mL<sup>-1</sup> Concentrations*

Kraig E. Strayer,<sup>1,2</sup> Heather M. Antonides,<sup>2</sup> Matthew P. Juhascik,<sup>2\*</sup> Raminta Daniulaityte,<sup>3</sup>

Ioana E. Sizemore<sup>1\*</sup>

<sup>1</sup>Department of Chemistry, Wright State University, 3640 Colonel Glenn Hwy., Dayton, Ohio 45435, United States

<sup>2</sup>Montgomery County Coroner's Office, 361 W. 3<sup>rd</sup> St., Dayton, Ohio 45402, United States

<sup>3</sup>Department of Population and Public Health Sciences, Wright State University, 3171 Research Boulevard Suite 234, Kettering, Ohio 45420 United States

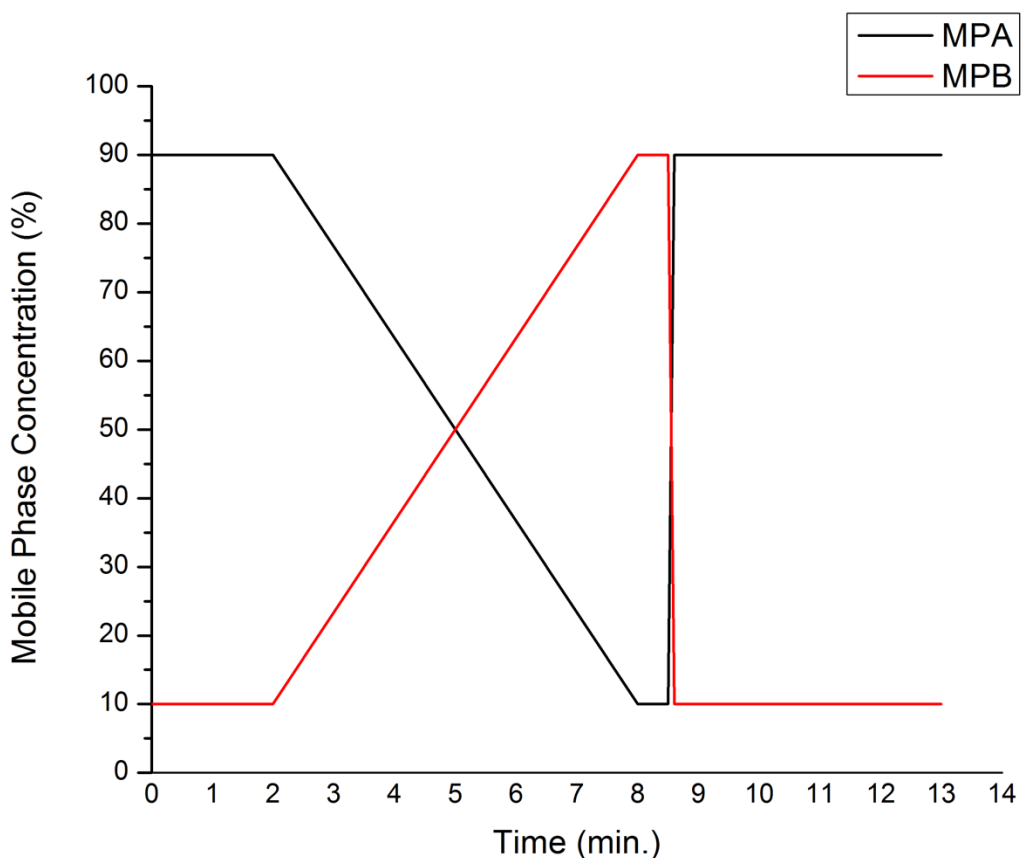

**Figure S1.** MPA and MPB gradient concentration change over a 13.5 minute per sample run period.

**Table S1.** Drugs commonly detected in toxicological screening ( $N = 70$ ) and tested in this study for exogenous interferences.

| Injection Mix   | Drugs included in the interference study test mix                                                                                                                                                                                                                             | Concentration<br>(ng mL <sup>-1</sup> ) |
|-----------------|-------------------------------------------------------------------------------------------------------------------------------------------------------------------------------------------------------------------------------------------------------------------------------|-----------------------------------------|
| Benzodiazepines | 7-Aminoclonazepam, 7-Aminoflunitrazepam, Alprazolam, Chlordiazepoxide, Clonazepam, Diazepam, Flunitrazepam, Flurazepam, Lorazepam, Midazolam, Nordiazepam, Oxazepam, Phenazepam, Temazepam, Triazolam                                                                         | 2,500                                   |
| Opiates         | Hydrocodone, Hydromorphone*, Oxycodone, Morphine, Oxymorphone*, 6-Acetylmorphine*, Codeine                                                                                                                                                                                    | 2,500*<br>10,000                        |
| Stimulants      | Cocaine, Cocaethylene, Ecgonine methyl ester, Benzoyllecgonine, Amphetamine, Phenylpropanolamine, Phentermine, Methamphetamine, Pseudoephedrine, Methylenedioxyamphetamine, Benzyl piperazine, Methylenedioxymethamphetamine, Methylenedioxyethylamphetamine, Methylphenidate | 1,250                                   |
| THC             | Tetrahydrocannabinolic acid*, Tetrahydrocannabinol                                                                                                                                                                                                                            | 1,250*<br>500                           |
| Bases           | Chlorpheniramine, Citalopram, Dextromethorphan, Doxylamine, Lidocaine, Methadone, Mirtazapine, Tramadol, Trazodone, Verapamil, Zolpidem                                                                                                                                       | 1,250                                   |
| AD              | Venlafaxine, Desvenlafaxine, Quetiapine, Paroxetine, Desipramine, Norfluoxetine, Imipramine, Fluoxetine, Nortriptyline, Cyclobenzaprine, Amitriptyline, Sertraline, Duloxetine                                                                                                | 1,250                                   |
| AE              | Gabapentin, Lamotrigine, Levetiracetam, Pregabalin, Topiramate, Zonisamide                                                                                                                                                                                                    | 5,000                                   |
| GHB             | Gamma hydroxybutyric acid                                                                                                                                                                                                                                                     | 50,000                                  |
| Rx              | Naloxone                                                                                                                                                                                                                                                                      | 10,000                                  |

**Table S2.** Recovery percentages for  $N=22$  illicitly manufactured fentanyl (IMF) analogues and metabolites at low ( $0.35 \text{ ng mL}^{-1}$ ), medium ( $2.5 \text{ ng mL}^{-1}$ ), and high control concentrations ( $25.0 \text{ ng mL}^{-1}$ ). Set #1 and #2 refer to post extraction spiked and regular extraction samples, respectively.

| <b>Norfentanyl</b>         |               |            |             |  |               |            |             |
|----------------------------|---------------|------------|-------------|--|---------------|------------|-------------|
|                            | <b>Set #1</b> |            |             |  | <b>Set #2</b> |            |             |
| <b>Trial no.</b>           | <b>Low</b>    | <b>Med</b> | <b>High</b> |  | <b>Low</b>    | <b>Med</b> | <b>High</b> |
| 1                          | 17631.48      | 140730.77  | 1000604.93  |  | 13814.81      | 108589.51  | 894437.11   |
| 2                          | 18047.00      | 137202.97  | 829527.44   |  | 14056.68      | 89730.02   | 960464.26   |
| 3                          | 18557.65      | 130331.00  | 1175213.13  |  | 16278.87      | 101081.64  | 872363.61   |
| <b>Average</b>             | 18078.71      | 136088.25  | 1001781.83  |  | 14716.78      | 99800.39   | 909088.33   |
| <b>Recovery (%)</b>        | 81.40         | 73.34      | 90.75       |  |               |            |             |
| <b>Furanyl norfentanyl</b> |               |            |             |  |               |            |             |
|                            | <b>Set #1</b> |            |             |  | <b>Set #2</b> |            |             |
| <b>Trial no.</b>           | <b>Low</b>    | <b>Med</b> | <b>High</b> |  | <b>Low</b>    | <b>Med</b> | <b>High</b> |
| 1                          | 4590.15       | 31704.02   | 230975.70   |  | 2561.18       | 25373.77   | 203161.69   |
| 2                          | 5487.52       | 28719.55   | 212752.81   |  | 2868.62       | 15808.62   | 254305.58   |
| 3                          | 5446.13       | 27056.84   | 304847.16   |  | 3643.37       | 17184.88   | 197428.08   |
| <b>Average</b>             | 5174.60       | 29160.14   | 249525.22   |  | 3024.39       | 19455.76   | 218298.45   |
| <b>Recovery (%)</b>        | 58.45         | 66.72      | 87.49       |  |               |            |             |
| <b>Remifentanil acid</b>   |               |            |             |  |               |            |             |
|                            | <b>Set #1</b> |            |             |  | <b>Set #2</b> |            |             |
| <b>Trial no.</b>           | <b>Low</b>    | <b>Med</b> | <b>High</b> |  | <b>Low</b>    | <b>Med</b> | <b>High</b> |
| 1                          | 2089.06       | 16561.54   | 167171.23   |  | 888.60        | 5835.51    | 50776.07    |
| 2                          | 2334.54       | 16266.17   | 157158.90   |  | 800.58        | 4657.90    | 52331.12    |
| 3                          | 2339.62       | 15863.99   | 155740.28   |  | 885.15        | 5417.15    | 49659.41    |
| <b>Average</b>             | 2254.40       | 16230.56   | 160023.47   |  | 858.11        | 5303.52    | 50922.20    |
| <b>Recovery (%)</b>        | 38.06         | 32.68      | 31.82       |  |               |            |             |
| <b>Butyryl norfentanyl</b> |               |            |             |  |               |            |             |
|                            | <b>Set #1</b> |            |             |  | <b>Set #2</b> |            |             |
| <b>Trial no.</b>           | <b>Low</b>    | <b>Med</b> | <b>High</b> |  | <b>Low</b>    | <b>Med</b> | <b>High</b> |
| 1                          | 19330.65      | 177026.12  | 1153778.73  |  | 18740.57      | 135942.06  | 1035652.82  |
| 2                          | 21813.09      | 175292.19  | 934465.45   |  | 17835.67      | 118133.80  | 1076581.04  |
| 3                          | 20551.76      | 168768.33  | 1307357.39  |  | 21253.04      | 129095.32  | 992372.29   |
| <b>Average</b>             | 20565.17      | 173695.55  | 1131867.19  |  | 19276.43      | 127723.73  | 1034868.72  |
| <b>Recovery (%)</b>        | 93.73         | 73.53      | 91.43       |  |               |            |             |
| <b>Remifentanil</b>        |               |            |             |  |               |            |             |
|                            | <b>Set #1</b> |            |             |  | <b>Set #2</b> |            |             |
| <b>Trial no.</b>           | <b>Low</b>    | <b>Med</b> | <b>High</b> |  | <b>Low</b>    | <b>Med</b> | <b>High</b> |
| 1                          | 3398.58       | 25879.27   | 247196.84   |  | 2769.84       | 19518.17   | 206515.06   |

|                                          |               |            |             |  |               |            |             |
|------------------------------------------|---------------|------------|-------------|--|---------------|------------|-------------|
| 2                                        | 3631.82       | 26098.03   | 251472.03   |  | 2732.97       | 16166.15   | 214967.39   |
| 3                                        | 3855.28       | 23094.96   | 262547.87   |  | 2863.09       | 20413.23   | 191769.16   |
| Average                                  | 3628.56       | 25024.09   | 253738.91   |  | 2788.64       | 18699.18   | 204417.20   |
| Recovery (%)                             | 76.85         | 74.72      | 80.56       |  |               |            |             |
| <b>Acetyl fentanyl</b>                   |               |            |             |  |               |            |             |
|                                          | <b>Set #1</b> |            |             |  | <b>Set #2</b> |            |             |
| <b>Trial no.</b>                         | <b>Low</b>    | <b>Med</b> | <b>High</b> |  | <b>Low</b>    | <b>Med</b> | <b>High</b> |
| 1                                        | 39163.01      | 307276.32  | 2737509.47  |  | 32202.32      | 242612.47  | 2319607.20  |
| 2                                        | 39599.84      | 295551.80  | 2686140.35  |  | 31485.04      | 208628.84  | 2443187.71  |
| 3                                        | 41336.33      | 279207.70  | 2690796.28  |  | 35728.32      | 246516.70  | 2248135.27  |
| Average                                  | 40033.06      | 294011.94  | 2704815.37  |  | 33138.56      | 232586.00  | 2336976.72  |
| Recovery (%)                             | 82.78         | 79.11      | 86.40       |  |               |            |             |
| <b>Alfentanil</b>                        |               |            |             |  |               |            |             |
|                                          | <b>Set #1</b> |            |             |  | <b>Set #2</b> |            |             |
| <b>Trial no.</b>                         | <b>Low</b>    | <b>Med</b> | <b>High</b> |  | <b>Low</b>    | <b>Med</b> | <b>High</b> |
| 1                                        | 16613.52      | 111052.10  | 1069888.51  |  | 9410.82       | 83578.37   | 829356.47   |
| 2                                        | 16148.05      | 106762.53  | 1091804.94  |  | 10494.02      | 68625.62   | 847084.67   |
| 3                                        | 16345.64      | 96063.01   | 1030880.31  |  | 11468.14      | 85460.45   | 800546.70   |
| Average                                  | 16369.07      | 104625.88  | 1064191.25  |  | 10457.66      | 79221.48   | 825662.61   |
| Recovery (%)                             | 63.89         | 75.72      | 77.59       |  |               |            |             |
| <b>AH-7921</b>                           |               |            |             |  |               |            |             |
|                                          | <b>Set #1</b> |            |             |  | <b>Set #2</b> |            |             |
| <b>Trial no.</b>                         | <b>Low</b>    | <b>Med</b> | <b>High</b> |  | <b>Low</b>    | <b>Med</b> | <b>High</b> |
| 1                                        | 5425.16       | 41519.09   | 171578.91   |  | 4987.49       | 30028.21   | 268991.42   |
| 2                                        | 5448.88       | 38275.23   | 187181.59   |  | 4626.44       | 29397.38   | 299962.16   |
| 3                                        | 5587.03       | 35003.78   | 317460.45   |  | 4828.00       | 33563.29   | 248723.39   |
| Average                                  | 5487.02       | 38266.03   | 225406.98   |  | 4813.98       | 30996.29   | 272558.99   |
| Recovery (%)                             | 87.73         | 81.00      | 120.92      |  |               |            |             |
| <b>U-47700</b>                           |               |            |             |  |               |            |             |
|                                          | <b>Set #1</b> |            |             |  | <b>Set 2</b>  |            |             |
| <b>Trial no.</b>                         | <b>Low</b>    | <b>Med</b> | <b>High</b> |  | <b>Low</b>    | <b>Med</b> | <b>High</b> |
| 1                                        | 8789.37       | 69172.60   | 663875.37   |  | 7419.27       | 55748.60   | 525822.70   |
| 2                                        | 7814.93       | 65002.70   | 675335.12   |  | 7911.76       | 51056.55   | 554450.77   |
| 3                                        | 9579.90       | 60507.01   | 611724.71   |  | 8857.27       | 53830.68   | 501931.10   |
| Average                                  | 8728.06       | 64894.10   | 650311.73   |  | 8062.76       | 53545.28   | 527401.53   |
| Recovery (%)                             | 92.38         | 82.51      | 81.10       |  |               |            |             |
| <b>Acetyl fentanyl 4-methylphenethyl</b> |               |            |             |  |               |            |             |
|                                          | <b>Set #1</b> |            |             |  | <b>Set #2</b> |            |             |
| <b>Trial no.</b>                         | <b>Low</b>    | <b>Med</b> | <b>High</b> |  | <b>Low</b>    | <b>Med</b> | <b>High</b> |

|                                    |               |            |             |  |               |            |             |
|------------------------------------|---------------|------------|-------------|--|---------------|------------|-------------|
| 1                                  | 43670.09      | 362857.36  | 3004272.27  |  | 39273.94      | 294742.30  | 2564883.21  |
| 2                                  | 49639.28      | 358218.25  | 2896594.04  |  | 40145.21      | 270667.02  | 2671448.69  |
| 3                                  | 52373.23      | 325855.55  | 2865642.66  |  | 46585.53      | 276548.83  | 2533831.52  |
| Average                            | 48560.87      | 348977.05  | 2922169.66  |  | 42001.56      | 280652.71  | 2590054.47  |
| Recovery (%)                       | 86.49         | 80.42      | 88.63       |  |               |            |             |
| <b>Acrylfentanyl</b>               |               |            |             |  |               |            |             |
|                                    | <b>Set #1</b> |            |             |  | <b>Set #2</b> |            |             |
| <b>Trial no.</b>                   | <b>Low</b>    | <b>Med</b> | <b>High</b> |  | <b>Low</b>    | <b>Med</b> | <b>High</b> |
| 1                                  | 46580.17      | 341583.14  | 2646397.46  |  | 37202.88      | 281712.87  | 2428913.55  |
| 2                                  | 46952.36      | 337096.36  | 2475688.79  |  | 37972.97      | 242770.34  | 2537661.55  |
| 3                                  | 48849.41      | 310714.29  | 2705321.61  |  | 43752.84      | 287579.53  | 2351749.58  |
| Average                            | 47460.65      | 329797.93  | 2609135.95  |  | 39642.89      | 270687.58  | 2439441.56  |
| Recovery (%)                       | 83.53         | 82.08      | 93.50       |  |               |            |             |
| <b>Fentanyl</b>                    |               |            |             |  |               |            |             |
|                                    | <b>Set #1</b> |            |             |  | <b>Set #2</b> |            |             |
| <b>Trial no.</b>                   | <b>Low</b>    | <b>Med</b> | <b>High</b> |  | <b>Low</b>    | <b>Med</b> | <b>High</b> |
| 1                                  | 36202.96      | 270883.19  | 2119693.09  |  | 29709.08      | 227320.04  | 2041829.06  |
| 2                                  | 35742.90      | 270642.79  | 2000594.92  |  | 29167.22      | 198024.25  | 2134377.46  |
| 3                                  | 36708.57      | 245358.38  | 2271119.18  |  | 35764.60      | 218804.82  | 1996871.66  |
| Average                            | 36218.14      | 262294.79  | 2130469.06  |  | 31546.97      | 214716.37  | 2057692.73  |
| Recovery (%)                       | 87.10         | 81.86      | 96.58       |  |               |            |             |
| <b><i>para</i>-Methoxyfentanyl</b> |               |            |             |  |               |            |             |
|                                    | <b>Set #1</b> |            |             |  | <b>Set #2</b> |            |             |
| <b>Trial no.</b>                   | <b>Low</b>    | <b>Med</b> | <b>High</b> |  | <b>Low</b>    | <b>Med</b> | <b>High</b> |
| 1                                  | 27904.20      | 216676.89  | 1614255.82  |  | 22788.33      | 171129.57  | 1444155.49  |
| 2                                  | 28721.90      | 201953.30  | 1627239.48  |  | 22972.15      | 154837.11  | 1453530.64  |
| 3                                  | 27416.76      | 187643.49  | 1650187.28  |  | 28583.31      | 181306.70  | 1446219.28  |
| Average                            | 28014.29      | 202091.22  | 1630560.86  |  | 24781.26      | 169091.13  | 1447968.47  |
| Recovery (%)                       | 88.46         | 83.67      | 88.80       |  |               |            |             |
| <b>4-ANPP</b>                      |               |            |             |  |               |            |             |
|                                    | <b>Set #1</b> |            |             |  | <b>Set #2</b> |            |             |
| <b>Trial no.</b>                   | <b>Low</b>    | <b>Med</b> | <b>High</b> |  | <b>Low</b>    | <b>Med</b> | <b>High</b> |
| 1                                  | 166174.74     | 1261945.01 | 8907584.39  |  | 190178.80     | 1229445.02 | 8369358.55  |
| 2                                  | 164486.85     | 1336291.01 | 7977401.72  |  | 180041.98     | 1076604.71 | 8607365.57  |
| 3                                  | 153677.98     | 1223611.13 | 9025869.40  |  | 202286.59     | 1208246.04 | 7867551.53  |
| Average                            | 161446.52     | 1273949.05 | 8636951.83  |  | 190835.79     | 1171431.92 | 8281425.22  |
| Recovery (%)                       | 118.20        | 91.95      | 95.88       |  |               |            |             |
| <b>Furanyl fentanyl</b>            |               |            |             |  |               |            |             |
|                                    | <b>Set #1</b> |            |             |  | <b>Set #2</b> |            |             |

| <b>Trial no.</b>                               | <b>Low</b>    | <b>Med</b> | <b>High</b> |  | <b>Low</b>    | <b>Med</b> | <b>High</b> |
|------------------------------------------------|---------------|------------|-------------|--|---------------|------------|-------------|
| 1                                              | 52810.26      | 387507.42  | 2941574.99  |  | 43119.60      | 311988.90  | 2601610.85  |
| 2                                              | 55872.20      | 383238.32  | 2976957.89  |  | 42896.47      | 273618.10  | 2713430.81  |
| 3                                              | 54758.43      | 355667.52  | 3015865.39  |  | 49315.64      | 319827.23  | 2468265.83  |
| Average                                        | 54480.30      | 375471.09  | 2978132.76  |  | 45110.57      | 301811.41  | 2594435.83  |
| Recovery (%)                                   | 82.80         | 80.38      | 87.12       |  |               |            |             |
| <b>Despropionyl <i>para</i>-fluorofentanyl</b> |               |            |             |  |               |            |             |
|                                                | <b>Set #1</b> |            |             |  | <b>Set #2</b> |            |             |
| <b>Trial no.</b>                               | <b>Low:</b>   | <b>Med</b> | <b>High</b> |  | <b>Low</b>    | <b>Med</b> | <b>High</b> |
| 1                                              | 32789.88      | 314597.61  | 2611783.53  |  | 44611.95      | 298602.77  | 2379969.31  |
| 2                                              | 32015.33      | 308942.79  | 2020791.13  |  | 42323.78      | 262062.45  | 2461242.98  |
| 3                                              | 32208.91      | 279852.22  | 2524003.09  |  | 48160.70      | 302515.48  | 2219544.67  |
| Average                                        | 32338.04      | 301130.88  | 2385525.92  |  | 45032.14      | 287726.90  | 2353585.65  |
| Recovery (%)                                   | 139.25        | 95.55      | 98.66       |  |               |            |             |
| <b>(±)-<i>cis</i>-3-Methyl fentanyl</b>        |               |            |             |  |               |            |             |
|                                                | <b>Set 1</b>  |            |             |  | <b>Set 2</b>  |            |             |
| <b>Trial no.</b>                               | <b>Low</b>    | <b>Med</b> | <b>High</b> |  | <b>Low</b>    | <b>Med</b> | <b>High</b> |
| 1                                              | 29995.09      | 191506.88  | 1699602.14  |  | 20491.67      | 156986.46  | 1478382.82  |
| 2                                              | 27567.04      | 188660.85  | 1677071.23  |  | 21452.07      | 141056.37  | 1509950.96  |
| 3                                              | 30375.57      | 168344.98  | 1696079.64  |  | 23994.77      | 155435.24  | 1401345.31  |
| Average                                        | 29312.57      | 182837.57  | 1690917.67  |  | 21979.50      | 151159.36  | 1463226.36  |
| Recovery (%)                                   | 74.98         | 82.67      | 86.53       |  |               |            |             |
| <b>Butyryl/Isobutyryl fentanyl</b>             |               |            |             |  |               |            |             |
|                                                | <b>Set #1</b> |            |             |  | <b>Set #2</b> |            |             |
| <b>Trial no.</b>                               | <b>Low</b>    | <b>Med</b> | <b>High</b> |  | <b>Low</b>    | <b>Med</b> | <b>High</b> |
| 1                                              | 43402.19      | 351851.45  | 2988080.64  |  | 39780.73      | 286850.10  | 2561000.97  |
| 2                                              | 45696.44      | 347785.05  | 2928941.15  |  | 40474.67      | 250218.59  | 2732200.06  |
| 3                                              | 45562.36      | 310423.46  | 2915792.27  |  | 41938.47      | 284702.64  | 2492138.07  |
| Average                                        | 44887.00      | 336686.65  | 2944271.35  |  | 40731.29      | 273923.77  | 2595113.03  |
| Recovery (%)                                   | 90.74         | 81.36      | 88.14       |  |               |            |             |
| <b>Carfentanil</b>                             |               |            |             |  |               |            |             |
|                                                | <b>Set #1</b> |            |             |  | <b>Set #2</b> |            |             |
| <b>Trial no.</b>                               | <b>Low</b>    | <b>Med</b> | <b>High</b> |  | <b>Low</b>    | <b>Med</b> | <b>High</b> |
| 1                                              | 26402.18      | 190896.65  | 1252684.53  |  | 20082.97      | 141783.79  | 1156826.21  |
| 2                                              | 26772.94      | 193793.45  | 1293548.17  |  | 19522.51      | 125922.13  | 1232173.90  |
| 3                                              | 27415.09      | 164202.38  | 1352347.09  |  | 21596.45      | 150266.11  | 1127003.16  |
| Average                                        | 26863.40      | 182964.16  | 1299526.60  |  | 20400.64      | 139324.01  | 1172001.09  |
| Recovery (%)                                   | 75.94         | 76.15      | 90.19       |  |               |            |             |
| <b><i>para</i>-Fluorobutyryl fentanyl/FIBF</b> |               |            |             |  |               |            |             |

|                         | <b>Set #1</b> |            |             |  | <b>Set #2</b> |            |             |
|-------------------------|---------------|------------|-------------|--|---------------|------------|-------------|
| <b>Trial no.</b>        | <b>Low</b>    | <b>Med</b> | <b>High</b> |  | <b>Low</b>    | <b>Med</b> | <b>High</b> |
| 1                       | 56583.98      | 381385.01  | 3052026.12  |  | 40598.62      | 312539.77  | 2654829.38  |
| 2                       | 58804.88      | 378836.24  | 2952835.55  |  | 39133.46      | 276976.56  | 2748411.38  |
| 3                       | 55929.45      | 348080.56  | 3027438.83  |  | 46283.60      | 320551.42  | 2534921.27  |
| Average                 | 57106.10      | 369433.94  | 3010766.83  |  | 42005.23      | 303355.92  | 2646054.01  |
| Recovery (%)            | 73.56         | 82.11      | 87.89       |  |               |            |             |
| <b>Sufentanil</b>       |               |            |             |  |               |            |             |
|                         | <b>Set #1</b> |            |             |  | <b>Set #2</b> |            |             |
| <b>Trial no.</b>        | <b>Low</b>    | <b>Med</b> | <b>High</b> |  | <b>Low</b>    | <b>Med</b> | <b>High</b> |
| 1                       | 23138.46      | 154831.15  | 1361946.43  |  | 16366.94      | 120199.93  | 1242166.50  |
| 2                       | 23670.37      | 148236.77  | 1328720.78  |  | 15683.01      | 110473.97  | 1269157.94  |
| 3                       | 24917.06      | 133487.14  | 1383698.29  |  | 19433.81      | 121634.57  | 1138826.22  |
| Average                 | 23908.63      | 145518.35  | 1358121.83  |  | 17161.25      | 117436.15  | 1216716.88  |
| Recovery (%)            | 71.78         | 80.70      | 89.59       |  |               |            |             |
| <b>Valeryl fentanyl</b> |               |            |             |  |               |            |             |
|                         | <b>Set 1</b>  |            |             |  | <b>Set 2</b>  |            |             |
| <b>Trial no.</b>        | <b>Low</b>    | <b>Med</b> | <b>High</b> |  | <b>Low</b>    | <b>Med</b> | <b>High</b> |
| 1                       | 56843.33      | 462938.62  | 3830025.05  |  | 51047.18      | 370795.17  | 3328155.43  |
| 2                       | 61663.39      | 453705.57  | 3921682.44  |  | 50457.26      | 327512.59  | 3497367.43  |
| 3                       | 59012.31      | 424183.71  | 3828719.32  |  | 58040.14      | 369396.01  | 3238100.13  |
| Average                 | 59173.01      | 446942.63  | 3860142.27  |  | 53181.53      | 355901.26  | 3354541.00  |
| Recovery (%)            | 89.87         | 79.63      | 86.90       |  |               |            |             |

**Table S3.** Ionization suppression and enhancement percentages for  $N = 22$  illicitly manufactured fentanyl (IMFs) analogues at low ( $0.35 \text{ ng mL}^{-1}$ ), medium ( $2.5 \text{ ng mL}^{-1}$ ), and high control concentrations ( $25.0 \text{ ng mL}^{-1}$ ). Set #1 and #2 refer to regular and neat quality standards, respectively.

| <b>Norfentanyl</b>         |               |            |             |  |               |            |             |
|----------------------------|---------------|------------|-------------|--|---------------|------------|-------------|
|                            | <b>Set #1</b> |            |             |  | <b>Set #2</b> |            |             |
| <b>Trial no.</b>           | <b>Low</b>    | <b>Med</b> | <b>High</b> |  | <b>Low</b>    | <b>Med</b> | <b>High</b> |
| 1                          | 16183.09      | 112346.21  | 1040696.84  |  | 17631.48      | 140730.77  | 1000604.93  |
| 2                          | 16400.53      | 110543.30  | 1001399.58  |  | 18047.00      | 137202.97  | 829527.44   |
| 3                          | 15576.46      | 120348.17  | 1069657.21  |  | 18557.65      | 130331.00  | 1175213.13  |
| Average                    | 16053.36      | 114412.56  | 1037251.21  |  | 18078.71      | 136088.25  | 1001781.83  |
| Matrix Effect (%)          | 112.62        | 118.95     | 96.58       |  |               |            |             |
| <b>Furanyl norfentanyl</b> |               |            |             |  |               |            |             |
|                            | <b>Set #1</b> |            |             |  | <b>Set #2</b> |            |             |
| <b>Trial no.</b>           | <b>Low</b>    | <b>Med</b> | <b>High</b> |  | <b>Low</b>    | <b>Med</b> | <b>High</b> |
| 1                          | 4565.76       | 26311.47   | 282170.68   |  | 4590.15       | 31704.02   | 230975.70   |
| 2                          | 4934.86       | 27258.58   | 196048.07   |  | 5487.52       | 28719.55   | 212752.81   |
| 3                          | 4379.86       | 27359.57   | 295672.89   |  | 5446.13       | 27056.84   | 304847.16   |
| Average                    | 4626.83       | 26976.54   | 257963.88   |  | 5174.60       | 29160.14   | 249525.22   |
| Matrix Effect (%)          | 111.84        | 108.09     | 96.73       |  |               |            |             |
| <b>Remifentanil acid</b>   |               |            |             |  |               |            |             |
|                            | <b>Set #1</b> |            |             |  | <b>Set #2</b> |            |             |
| <b>Trial no.</b>           | <b>Low</b>    | <b>Med</b> | <b>High</b> |  | <b>Low</b>    | <b>Med</b> | <b>High</b> |
| 1                          | 1912.22       | 13115.17   | 148736.10   |  | 2089.06       | 16561.54   | 167171.23   |
| 2                          | 2044.45       | 12727.17   | 158545.18   |  | 2334.54       | 16266.17   | 157158.90   |
| 3                          | 1799.16       | 13111.16   | 146491.63   |  | 2339.62       | 15863.99   | 155740.28   |
| Average                    | 1918.61       | 12984.50   | 151257.64   |  | 2254.40       | 16230.56   | 160023.47   |
| Matrix Effect (%)          | 117.50        | 125.00     | 105.80      |  |               |            |             |
| <b>Butyryl norfentanyl</b> |               |            |             |  |               |            |             |
|                            | <b>Set #1</b> |            |             |  | <b>Set #2</b> |            |             |
| <b>Trial no.</b>           | <b>Low</b>    | <b>Med</b> | <b>High</b> |  | <b>Low</b>    | <b>Med</b> | <b>High</b> |
| 1                          | 17944.00      | 133950.12  | 1168174.85  |  | 19330.65      | 177026.12  | 1153778.73  |
| 2                          | 19068.89      | 136111.96  | 1178733.62  |  | 21813.09      | 175292.19  | 934465.45   |
| 3                          | 18347.13      | 146972.56  | 1186049.58  |  | 20551.76      | 168768.33  | 1307357.39  |
| Average                    | 18453.34      | 139011.55  | 1177652.68  |  | 20565.17      | 173695.55  | 1131867.19  |
| Matrix Effect (%)          | 111.44        | 124.95     | 96.11       |  |               |            |             |
| <b>Remifentanil</b>        |               |            |             |  |               |            |             |



|                        | Set #1   |           |            | Set #2   |           |            |
|------------------------|----------|-----------|------------|----------|-----------|------------|
| Trial no.              | Low      | Med       | High       | Low      | Med       | High       |
| 1                      | 3698.61  | 24148.82  | 245580.98  | 3398.58  | 25879.27  | 247196.84  |
| 2                      | 4110.52  | 31187.58  | 258044.21  | 3631.82  | 26098.03  | 251472.03  |
| 3                      | 3395.64  | 30361.85  | 270170.79  | 3855.28  | 23094.96  | 262547.87  |
| Average                | 3734.92  | 28566.08  | 257931.99  | 3628.56  | 25024.09  | 253738.91  |
| Matrix Effect (%)      | 97.15    | 87.60     | 98.37      |          |           |            |
| <b>Acetyl Fentanyl</b> |          |           |            |          |           |            |
|                        | Set #1   |           |            | Set #2   |           |            |
| Trial no.              | Low      | Med       | High       | Low      | Med       | High       |
| 1                      | 32900.81 | 272480.22 | 2696875.16 | 39163.01 | 307276.32 | 2737509.47 |
| 2                      | 38733.20 | 274894.98 | 2701173.97 | 39599.84 | 295551.80 | 2686140.35 |
| 3                      | 38518.67 | 280970.95 | 2735233.43 | 41336.33 | 279207.70 | 2690796.28 |
| Average                | 36717.56 | 276115.38 | 2711094.19 | 40033.06 | 294011.94 | 2704815.37 |
| Matrix Effect (%)      | 109.03   | 106.48    | 99.77      |          |           |            |
| <b>Alfentanil</b>      |          |           |            |          |           |            |
|                        | Set #1   |           |            | Set #2   |           |            |
| Trial no.              | Low      | Med       | High       | Low      | Med       | High       |
| 1                      | 16619.67 | 112384.98 | 1045263.57 | 16613.52 | 111052.10 | 1069888.51 |
| 2                      | 18109.61 | 118183.23 | 1046701.52 | 16148.05 | 106762.53 | 1091804.94 |
| 3                      | 17756.09 | 119055.84 | 1092001.13 | 16345.64 | 96063.01  | 1030880.31 |
| Average                | 17495.12 | 116541.35 | 1061322.07 | 16369.07 | 104625.88 | 1064191.25 |
| Matrix Effect (%)      | 93.56    | 89.78     | 100.27     |          |           |            |
| <b>AH7921</b>          |          |           |            |          |           |            |
|                        | Set #1   |           |            | Set #2   |           |            |
| Trial no.              | Low      | Med       | High       | Low      | Med       | High       |
| 1                      | 6566.28  | 48615.06  | 476009.13  | 5425.16  | 41519.09  | 171578.91  |
| 2                      | 7633.34  | 48108.20  | 473702.01  | 5448.88  | 38275.23  | 187181.59  |
| 3                      | 6878.39  | 47187.37  | 467335.92  | 5587.03  | 35003.78  | 317460.45  |
| Average                | 7026.00  | 47970.21  | 472349.02  | 5487.02  | 38266.03  | 225406.98  |
| Matrix Effect (%)      | 78.10    | 79.77     | 47.72      |          |           |            |
| <b>U-47700</b>         |          |           |            |          |           |            |
|                        | Set #1   |           |            | Set #2   |           |            |
| Trial no.              | Low      | Med       | High       | Low      | Med       | High       |
| 1                      | 9035.57  | 60676.63  | 598626.36  | 8789.37  | 69172.60  | 663875.37  |
| 2                      | 8841.10  | 60748.85  | 589120.64  | 7814.93  | 65002.70  | 675335.12  |
| 3                      | 9052.78  | 61807.71  | 555878.02  | 9579.90  | 60507.01  | 611724.71  |

|                                          |               |            |             |  |               |            |             |
|------------------------------------------|---------------|------------|-------------|--|---------------|------------|-------------|
| Average                                  | 8976.48       | 61077.73   | 581208.34   |  | 8728.06       | 64894.10   | 650311.73   |
| Matrix Effect (%)                        | 97.23         | 106.25     | 111.89      |  |               |            |             |
| <b>Acetyl fentanyl 4-methylphenethyl</b> |               |            |             |  |               |            |             |
|                                          | <b>Set #1</b> |            |             |  | <b>Set #2</b> |            |             |
| <b>Trial no.</b>                         | <b>Low</b>    | <b>Med</b> | <b>High</b> |  | <b>Low</b>    | <b>Med</b> | <b>High</b> |
| 1                                        | 48878.21      | 329056.56  | 2764066.69  |  | 43670.09      | 362857.36  | 3004272.27  |
| 2                                        | 49041.99      | 317459.70  | 2771548.48  |  | 49639.28      | 358218.25  | 2896594.04  |
| 3                                        | 46270.71      | 329783.06  | 2784287.37  |  | 52373.23      | 325855.55  | 2865642.66  |
| Average                                  | 48063.64      | 325433.11  | 2773300.84  |  | 48560.87      | 348977.05  | 2922169.66  |
| Matrix Effect (%)                        | 101.03        | 107.23     | 105.37      |  |               |            |             |
| <b>Acrylfentanyl</b>                     |               |            |             |  |               |            |             |
|                                          | <b>Set #1</b> |            |             |  | <b>Set #2</b> |            |             |
| <b>Trial no.</b>                         | <b>Low</b>    | <b>Med</b> | <b>High</b> |  | <b>Low</b>    | <b>Med</b> | <b>High</b> |
| 1                                        | 43882.58      | 308992.39  | 2536934.84  |  | 46580.17      | 341583.14  | 2646397.46  |
| 2                                        | 46517.72      | 293356.95  | 2596363.31  |  | 46952.36      | 337096.36  | 2475688.79  |
| 3                                        | 44189.23      | 305741.89  | 2595711.68  |  | 48849.41      | 310714.29  | 2705321.61  |
| Average                                  | 44863.18      | 302697.08  | 2576336.61  |  | 47460.65      | 329797.93  | 2609135.95  |
| Matrix Effect (%)                        | 105.79        | 108.95     | 101.27      |  |               |            |             |
| <b>Fentanyl</b>                          |               |            |             |  |               |            |             |
|                                          | <b>Set #1</b> |            |             |  | <b>Set #2</b> |            |             |
| <b>Trial no.</b>                         | <b>Low</b>    | <b>Med</b> | <b>High</b> |  | <b>Low</b>    | <b>Med</b> | <b>High</b> |
| 1                                        | 35121.93      | 243862.09  | 2277257.74  |  | 36202.96      | 270883.19  | 2119693.09  |
| 2                                        | 36338.33      | 272959.43  | 2236877.77  |  | 35742.90      | 270642.79  | 2000594.92  |
| 3                                        | 37012.04      | 266771.73  | 2381041.33  |  | 36708.57      | 245358.38  | 2271119.18  |
| Average                                  | 36157.43      | 261197.75  | 2298392.28  |  | 36218.14      | 262294.79  | 2130469.06  |
| Matrix Effect (%)                        | 100.17        | 100.42     | 92.69       |  |               |            |             |
| <b>para-Methoxyfentanyl</b>              |               |            |             |  |               |            |             |
|                                          | <b>Set #1</b> |            |             |  | <b>Set #2</b> |            |             |
| <b>Trial no.</b>                         | <b>Low</b>    | <b>Med</b> | <b>High</b> |  | <b>Low</b>    | <b>Med</b> | <b>High</b> |
| 1                                        | 27910.62      | 182350.93  | 1495982.69  |  | 27904.20      | 216676.89  | 1614255.82  |
| 2                                        | 28307.99      | 187967.00  | 1560701.40  |  | 28721.90      | 201953.30  | 1627239.48  |
| 3                                        | 27175.06      | 188179.96  | 1535007.01  |  | 27416.76      | 187643.49  | 1650187.28  |
| Average                                  | 27797.89      | 186165.96  | 1530563.70  |  | 28014.29      | 202091.22  | 1630560.86  |
| Matrix Effect (%)                        | 100.78        | 108.55     | 106.53      |  |               |            |             |
| <b>4ANPP</b>                             |               |            |             |  |               |            |             |
|                                          | <b>Set #1</b> |            |             |  | <b>Set #2</b> |            |             |
| <b>Trial no.</b>                         | <b>Low</b>    | <b>Med</b> | <b>High</b> |  | <b>Low</b>    | <b>Med</b> | <b>High</b> |

|                                                |               |            |             |  |               |            |             |
|------------------------------------------------|---------------|------------|-------------|--|---------------|------------|-------------|
| 1                                              | 250705.82     | 1588320.59 | 10328356.33 |  | 166174.74     | 1261945.01 | 8907584.39  |
| 2                                              | 258303.65     | 1581159.69 | 10153768.64 |  | 164486.85     | 1336291.01 | 7977401.72  |
| 3                                              | 243397.40     | 1581703.72 | 10159658.74 |  | 153677.98     | 1223611.13 | 9025869.40  |
| Average                                        | 250802.29     | 1583728.00 | 10213927.90 |  | 161446.52     | 1273949.05 | 8636951.83  |
| Matrix Effect (%)                              | 64.37         | 80.44      | 84.56       |  |               |            |             |
| <b>Furanyl Fentanyl</b>                        |               |            |             |  |               |            |             |
|                                                | <b>Set #1</b> |            |             |  | <b>Set #2</b> |            |             |
| <b>Trial no.</b>                               | <b>Low</b>    | <b>Med</b> | <b>High</b> |  | <b>Low</b>    | <b>Med</b> | <b>High</b> |
| 1                                              | 49598.48      | 349942.60  | 2901533.55  |  | 52810.26      | 387507.42  | 2941574.99  |
| 2                                              | 53154.12      | 346954.45  | 2836640.95  |  | 55872.20      | 383238.32  | 2976957.89  |
| 3                                              | 51906.40      | 357217.84  | 2887911.90  |  | 54758.43      | 355667.52  | 3015865.39  |
| Average                                        | 51553.00      | 351371.63  | 2875362.13  |  | 54480.30      | 375471.09  | 2978132.76  |
| Matrix Effect (%)                              | 105.68        | 106.86     | 103.57      |  |               |            |             |
| <b>Despropionyl <i>para</i>-fluorofentanyl</b> |               |            |             |  |               |            |             |
|                                                | <b>Set #1</b> |            |             |  | <b>Set #2</b> |            |             |
| <b>Trial no.</b>                               | <b>Low</b>    | <b>Med</b> | <b>High</b> |  | <b>Low</b>    | <b>Med</b> | <b>High</b> |
| 1                                              | 55310.89      | 410215.90  | 3346009.48  |  | 32789.88      | 314597.61  | 2611783.53  |
| 2                                              | 59539.77      | 417208.83  | 3306663.71  |  | 32015.33      | 308942.79  | 2020791.13  |
| 3                                              | 54462.41      | 429930.16  | 3259141.25  |  | 32208.91      | 279852.22  | 2524003.09  |
| Average                                        | 56437.69      | 419118.30  | 3303938.15  |  | 32338.04      | 301130.88  | 2385525.92  |
| Matrix Effect (%)                              | 57.30         | 71.85      | 72.20       |  |               |            |             |
| <b>(±)-<i>cis</i>-3-Methyl fentanyl</b>        |               |            |             |  |               |            |             |
|                                                | <b>Set #1</b> |            |             |  | <b>Set #2</b> |            |             |
| <b>Trial no.</b>                               | <b>Low</b>    | <b>Med</b> | <b>High</b> |  | <b>Low</b>    | <b>Med</b> | <b>High</b> |
| 1                                              | 24054.35      | 166202.47  | 1583431.31  |  | 29995.09      | 191506.88  | 1699602.14  |
| 2                                              | 27032.87      | 169935.48  | 1605989.18  |  | 27567.04      | 188660.85  | 1677071.23  |
| 3                                              | 28262.03      | 170303.84  | 1617468.23  |  | 30375.57      | 168344.98  | 1696079.64  |
| Average                                        | 26449.75      | 168813.93  | 1602296.24  |  | 29312.57      | 182837.57  | 1690917.67  |
| Matrix Effect (%)                              | 110.82        | 108.31     | 105.53      |  |               |            |             |
| <b>Butyryl/Isobutyryl Fentanyl</b>             |               |            |             |  |               |            |             |
|                                                | <b>Set #1</b> |            |             |  | <b>Set #2</b> |            |             |
| <b>Trial no.</b>                               | <b>Low</b>    | <b>Med</b> | <b>High</b> |  | <b>Low</b>    | <b>Med</b> | <b>High</b> |
| 1                                              | 45422.09      | 314101.40  | 2930769.08  |  | 43402.19      | 351851.45  | 2988080.64  |
| 2                                              | 43811.81      | 330407.44  | 2863257.61  |  | 45696.44      | 347785.05  | 2928941.15  |
| 3                                              | 43617.99      | 318274.99  | 2892301.46  |  | 45562.36      | 310423.46  | 2915792.27  |
| Average                                        | 44283.97      | 320927.94  | 2895442.71  |  | 44887.00      | 336686.65  | 2944271.35  |
| Matrix Effect (%)                              | 101.36        | 104.91     | 101.69      |  |               |            |             |

| <b>Carfentanil</b>             |               |            |             |  |               |            |             |
|--------------------------------|---------------|------------|-------------|--|---------------|------------|-------------|
|                                | <b>Set #1</b> |            |             |  | <b>Set #2</b> |            |             |
| <b>Trial no.</b>               | <b>Low</b>    | <b>Med</b> | <b>High</b> |  | <b>Low</b>    | <b>Med</b> | <b>High</b> |
| 1                              | 29581.26      | 190158.75  | 1361256.73  |  | 26402.18      | 190896.65  | 1252684.53  |
| 2                              | 28035.22      | 185363.84  | 1327128.00  |  | 26772.94      | 193793.45  | 1293548.17  |
| 3                              | 28947.85      | 186650.17  | 1340755.27  |  | 27415.09      | 164202.38  | 1352347.09  |
| Average                        | 28854.78      | 187390.92  | 1343046.67  |  | 26863.40      | 182964.16  | 1299526.60  |
| Matrix Effect (%)              | 93.10         | 97.64      | 96.76       |  |               |            |             |
| <b>para-Fluorobutyryl/FIBF</b> |               |            |             |  |               |            |             |
|                                | <b>Set #1</b> |            |             |  | <b>Set #2</b> |            |             |
| <b>Trial no.</b>               | <b>Low</b>    | <b>Med</b> | <b>High</b> |  | <b>Low</b>    | <b>Med</b> | <b>High</b> |
| 1                              | 54002.16      | 342912.34  | 2955695.73  |  | 56583.98      | 381385.01  | 3052026.12  |
| 2                              | 56611.46      | 339053.46  | 2918068.58  |  | 58804.88      | 378836.24  | 2952835.55  |
| 3                              | 58760.62      | 353647.81  | 2923275.93  |  | 55929.45      | 348080.56  | 3027438.83  |
| Average                        | 56458.08      | 345204.54  | 2932346.74  |  | 57106.10      | 369433.94  | 3010766.83  |
| Matrix Effect (%)              | 101.15        | 107.02     | 102.67      |  |               |            |             |
| <b>Sufentanil</b>              |               |            |             |  |               |            |             |
|                                | <b>Set #1</b> |            |             |  | <b>Set #2</b> |            |             |
| <b>Trial no.</b>               | <b>Low</b>    | <b>Med</b> | <b>High</b> |  | <b>Low</b>    | <b>Med</b> | <b>High</b> |
| 1                              | 21378.68      | 141092.61  | 1353710.93  |  | 23138.46      | 154831.15  | 1361946.43  |
| 2                              | 23467.13      | 133429.58  | 1365799.90  |  | 23670.37      | 148236.77  | 1328720.78  |
| 3                              | 21426.18      | 137804.06  | 1362923.38  |  | 24917.06      | 133487.14  | 1383698.29  |
| Average                        | 22090.66      | 137442.08  | 1360811.40  |  | 23908.63      | 145518.35  | 1358121.83  |
| Matrix Effect (%)              | 108.23        | 105.88     | 99.80       |  |               |            |             |
| <b>Valeryl Fentanyl</b>        |               |            |             |  |               |            |             |
|                                | <b>Set #1</b> |            |             |  | <b>Set #2</b> |            |             |
| <b>Trial no.</b>               | <b>Low</b>    | <b>Med</b> | <b>High</b> |  | <b>Low</b>    | <b>Med</b> | <b>High</b> |
| 1                              | 59939.19      | 373667.31  | 3834026.52  |  | 56843.33      | 462938.62  | 3830025.05  |
| 2                              | 62192.36      | 419395.23  | 3638907.11  |  | 61663.39      | 453705.57  | 3921682.44  |
| 3                              | 60773.11      | 434846.52  | 3925964.13  |  | 59012.31      | 424183.71  | 3828719.32  |
| Average                        | 60968.22      | 409303.02  | 3799632.58  |  | 59173.01      | 446942.63  | 3860142.27  |
| Matrix Effect (%)              | 97.06         | 109.20     | 101.59      |  |               |            |             |

**Table S4.** Process efficiency percentages for  $N = 22$  illicitly manufactured fentanyl (IMFs) analogues at low ( $0.35 \text{ ng mL}^{-1}$ ), medium ( $2.5 \text{ ng mL}^{-1}$ ), and high control concentrations ( $25.0 \text{ ng mL}^{-1}$ ). Set #1 and #2 refer to neat quality standards and regular extractions, respectively.

| Norfentanyl            |          |           |            |  |          |           |            |
|------------------------|----------|-----------|------------|--|----------|-----------|------------|
|                        | Set #1   |           |            |  | Set #2   |           |            |
| Trial no.              | Low      | Med       | High       |  | Low      | Med       | High       |
| 1                      | 16183.09 | 112346.21 | 1040696.84 |  | 13814.81 | 108589.51 | 894437.11  |
| 2                      | 16400.53 | 110543.30 | 1001399.58 |  | 14056.68 | 89730.02  | 960464.26  |
| 3                      | 15576.46 | 120348.17 | 1069657.21 |  | 16278.87 | 101081.64 | 872363.61  |
| Average                | 16053.36 | 114412.56 | 1037251.21 |  | 14716.78 | 99800.39  | 909088.33  |
| Process Efficiency (%) | 91.67    | 87.23     | 87.64      |  |          |           |            |
| Furanyl norfentanyl    |          |           |            |  |          |           |            |
|                        | Set #1   |           |            |  | Set #2   |           |            |
| Trial no.              | Low      | Med       | High       |  | Low      | Med       | High       |
| 1                      | 4565.76  | 26311.47  | 282170.68  |  | 2561.18  | 25373.77  | 203161.69  |
| 2                      | 4934.86  | 27258.58  | 196048.07  |  | 2868.62  | 15808.62  | 254305.58  |
| 3                      | 4379.86  | 27359.57  | 295672.89  |  | 3643.37  | 17184.88  | 197428.08  |
| Average                | 4626.83  | 26976.54  | 257963.88  |  | 3024.39  | 19455.76  | 218298.45  |
| Process Efficiency (%) | 65.37    | 72.12     | 84.62      |  |          |           |            |
| Remifentanil acid      |          |           |            |  |          |           |            |
|                        | Set #1   |           |            |  | Set #2   |           |            |
| Trial no.              | Low      | Med       | High       |  | Low      | Med       | High       |
| 1                      | 1912.22  | 13115.17  | 148736.10  |  | 888.60   | 5835.51   | 50776.07   |
| 2                      | 2044.45  | 12727.17  | 158545.18  |  | 800.58   | 4657.90   | 52331.12   |
| 3                      | 1799.16  | 13111.16  | 146491.63  |  | 885.15   | 5417.15   | 49659.41   |
| Average                | 1918.61  | 12984.50  | 151257.64  |  | 858.11   | 5303.52   | 50922.20   |
| Process Efficiency (%) | 44.73    | 40.84     | 33.67      |  |          |           |            |
| Butyryl norfentanyl    |          |           |            |  |          |           |            |
|                        | Set #1   |           |            |  | Set #2   |           |            |
| Trial no.              | Low      | Med       | High       |  | Low      | Med       | High       |
| 1                      | 17944.00 | 133950.12 | 1168174.85 |  | 18740.57 | 135942.06 | 1035652.82 |
| 2                      | 19068.89 | 136111.96 | 1178733.62 |  | 17835.67 | 118133.80 | 1076581.04 |
| 3                      | 18347.13 | 146972.56 | 1186049.58 |  | 21253.04 | 129095.32 | 992372.29  |
| Average                | 18453.34 | 139011.55 | 1177652.68 |  | 19276.43 | 127723.73 | 1034868.72 |
| Process                | 104.46   | 91.88     | 87.88      |  |          |           |            |

|                        |               |            |             |  |               |            |
|------------------------|---------------|------------|-------------|--|---------------|------------|
| Efficiency (%)         |               |            |             |  |               |            |
| <b>Remifentanil</b>    |               |            |             |  |               |            |
|                        | <b>Set #1</b> |            |             |  | <b>Set #2</b> |            |
| <b>Trial no.</b>       | <b>Low</b>    | <b>Med</b> | <b>High</b> |  | <b>Low</b>    | <b>Med</b> |
| 1                      | 3698.61       | 24148.82   | 245580.98   |  | 2769.84       | 19518.17   |
| 2                      | 4110.52       | 31187.58   | 258044.21   |  | 2732.97       | 16166.15   |
| 3                      | 3395.64       | 30361.85   | 270170.79   |  | 2863.09       | 20413.23   |
| Average                | 3734.92       | 28566.08   | 257931.99   |  | 2788.64       | 18699.18   |
| Process Efficiency (%) | 74.66         | 65.46      | 79.25       |  |               |            |
| <b>Acetyl Fentanyl</b> |               |            |             |  |               |            |
|                        | <b>Set #1</b> |            |             |  | <b>Set #2</b> |            |
| <b>Trial no.</b>       | <b>Low</b>    | <b>Med</b> | <b>High</b> |  | <b>Low</b>    | <b>Med</b> |
| 1                      | 32900.81      | 272480.22  | 2696875.16  |  | 32202.32      | 242612.47  |
| 2                      | 38733.20      | 274894.98  | 2701173.97  |  | 31485.04      | 208628.84  |
| 3                      | 38518.67      | 280970.95  | 2735233.43  |  | 35728.32      | 246516.70  |
| Average                | 36717.56      | 276115.38  | 2711094.19  |  | 33138.56      | 232586.00  |
| Process Efficiency (%) | 90.25         | 84.24      | 86.20       |  |               |            |
| <b>Alfentanil</b>      |               |            |             |  |               |            |
|                        | <b>Set #1</b> |            |             |  | <b>Set #2</b> |            |
| <b>Trial no.</b>       | <b>Low</b>    | <b>Med</b> | <b>High</b> |  | <b>Low</b>    | <b>Med</b> |
| 1                      | 16619.67      | 112384.98  | 1045263.57  |  | 9410.82       | 83578.37   |
| 2                      | 18109.61      | 118183.23  | 1046701.52  |  | 10494.02      | 68625.62   |
| 3                      | 17756.09      | 119055.84  | 1092001.13  |  | 11468.14      | 85460.45   |
| Average                | 17495.12      | 116541.35  | 1061322.07  |  | 10457.66      | 79221.48   |
| Process Efficiency (%) | 59.77         | 67.98      | 77.80       |  |               |            |
| <b>AH7921</b>          |               |            |             |  |               |            |
|                        | <b>Set #1</b> |            |             |  | <b>Set #2</b> |            |
| <b>Trial no.</b>       | <b>Low</b>    | <b>Med</b> | <b>High</b> |  | <b>Low</b>    | <b>Med</b> |
| 1                      | 6566.28       | 48615.06   | 476009.13   |  | 4987.49       | 30028.21   |
| 2                      | 7633.34       | 48108.20   | 473702.01   |  | 4626.44       | 29397.38   |
| 3                      | 6878.39       | 47187.37   | 467335.92   |  | 4828.00       | 33563.29   |
| Average                | 7026.00       | 47970.21   | 472349.02   |  | 4813.98       | 30996.29   |
| Process Efficiency (%) | 68.52         | 64.62      | 57.70       |  |               |            |
| <b>U-47700</b>         |               |            |             |  |               |            |

|                                          | Set #1   |           |            | Set #2   |           |            |
|------------------------------------------|----------|-----------|------------|----------|-----------|------------|
| Trial no.                                | Low      | Med       | High       | Low      | Med       | High       |
| 1                                        | 9035.57  | 60676.63  | 598626.36  | 7419.27  | 55748.60  | 525822.70  |
| 2                                        | 8841.10  | 60748.85  | 589120.64  | 7911.76  | 51056.55  | 554450.77  |
| 3                                        | 9052.78  | 61807.71  | 555878.02  | 8857.27  | 53830.68  | 501931.10  |
| Average                                  | 8976.48  | 61077.73  | 581208.34  | 8062.76  | 53545.28  | 527401.53  |
| Process Efficiency (%)                   | 89.82    | 87.67     | 90.74      |          |           |            |
| <b>Acetyl fentanyl 4-methylphenethyl</b> |          |           |            |          |           |            |
|                                          | Set #1   |           |            | Set #2   |           |            |
| Trial no.                                | Low      | Med       | High       | Low      | Med       | High       |
| 1                                        | 48878.21 | 329056.56 | 2764066.69 | 39273.94 | 294742.30 | 2564883.21 |
| 2                                        | 49041.99 | 317459.70 | 2771548.48 | 40145.21 | 270667.02 | 2671448.69 |
| 3                                        | 46270.71 | 329783.06 | 2784287.37 | 46585.53 | 276548.83 | 2533831.52 |
| Average                                  | 48063.64 | 325433.11 | 2773300.84 | 42001.56 | 280652.71 | 2590054.47 |
| Process Efficiency (%)                   | 87.39    | 86.24     | 93.39      |          |           |            |
| <b>Acrylfentanyl</b>                     |          |           |            |          |           |            |
|                                          | Set #1   |           |            | Set #2   |           |            |
| Trial no.                                | Low      | Med       | High       | Low      | Med       | High       |
| 1                                        | 43882.58 | 308992.39 | 2536934.84 | 37202.88 | 281712.87 | 2428913.55 |
| 2                                        | 46517.72 | 293356.95 | 2596363.31 | 37972.97 | 242770.34 | 2537661.55 |
| 3                                        | 44189.23 | 305741.89 | 2595711.68 | 43752.84 | 287579.53 | 2351749.58 |
| Average                                  | 44863.18 | 302697.08 | 2576336.61 | 39642.89 | 270687.58 | 2439441.56 |
| Process Efficiency (%)                   | 88.36    | 89.43     | 94.69      |          |           |            |
| <b>Fentanyl</b>                          |          |           |            |          |           |            |
|                                          | Set #1   |           |            | Set #2   |           |            |
| Trial no.                                | Low      | Med       | High       | Low      | Med       | High       |
| 1                                        | 35121.93 | 243862.09 | 2277257.74 | 29709.08 | 227320.04 | 2041829.06 |
| 2                                        | 36338.33 | 272959.43 | 2236877.77 | 29167.22 | 198024.25 | 2134377.46 |
| 3                                        | 37012.04 | 266771.73 | 2381041.33 | 35764.60 | 218804.82 | 1996871.66 |
| Average                                  | 36157.43 | 261197.75 | 2298392.28 | 31546.97 | 214716.37 | 2057692.73 |
| Process Efficiency (%)                   | 87.25    | 82.20     | 89.53      |          |           |            |
| <b>para-Methoxyfentanyl</b>              |          |           |            |          |           |            |
|                                          | Set #1   |           |            | Set #2   |           |            |
| Trial no.                                | Low      | Med       | High       | Low      | Med       | High       |
| 1                                        | 27910.62 | 182350.93 | 1495982.69 | 22788.33 | 171129.57 | 1444155.49 |

|                                                |               |            |             |  |               |            |             |
|------------------------------------------------|---------------|------------|-------------|--|---------------|------------|-------------|
| 2                                              | 28307.99      | 187967.00  | 1560701.40  |  | 22972.15      | 154837.11  | 1453530.64  |
| 3                                              | 27175.06      | 188179.96  | 1535007.01  |  | 28583.31      | 181306.70  | 1446219.28  |
| Average                                        | 27797.89      | 186165.96  | 1530563.70  |  | 24781.26      | 169091.13  | 1447968.47  |
| Process Efficiency (%)                         | 89.15         | 90.83      | 94.60       |  |               |            |             |
| <b>4ANPP</b>                                   |               |            |             |  |               |            |             |
|                                                | <b>Set #1</b> |            |             |  | <b>Set #2</b> |            |             |
| <b>Trial no.</b>                               | <b>Low</b>    | <b>Med</b> | <b>High</b> |  | <b>Low</b>    | <b>Med</b> | <b>High</b> |
| 1                                              | 250705.82     | 1588320.59 | 10328356.33 |  | 190178.80     | 1229445.02 | 8369358.55  |
| 2                                              | 258303.65     | 1581159.69 | 10153768.64 |  | 180041.98     | 1076604.71 | 8607365.57  |
| 3                                              | 243397.40     | 1581703.72 | 10159658.74 |  | 202286.59     | 1208246.04 | 7867551.53  |
| Average                                        | 250802.29     | 1583728.00 | 10213927.90 |  | 190835.79     | 1171431.92 | 8281425.22  |
| Process Efficiency (%)                         | 76.09         | 73.97      | 81.08       |  |               |            |             |
| <b>Furanyl Fentanyl</b>                        |               |            |             |  |               |            |             |
|                                                | <b>Set #1</b> |            |             |  | <b>Set #2</b> |            |             |
| <b>Trial no.</b>                               | <b>Low</b>    | <b>Med</b> | <b>High</b> |  | <b>Low</b>    | <b>Med</b> | <b>High</b> |
| 1                                              | 49598.48      | 349942.60  | 2901533.55  |  | 43119.60      | 311988.90  | 2601610.85  |
| 2                                              | 53154.12      | 346954.45  | 2836640.95  |  | 42896.47      | 273618.10  | 2713430.81  |
| 3                                              | 51906.40      | 357217.84  | 2887911.90  |  | 49315.64      | 319827.23  | 2468265.83  |
| Average                                        | 51553.00      | 351371.63  | 2875362.13  |  | 45110.57      | 301811.41  | 2594435.83  |
| Process Efficiency (%)                         | 87.50         | 85.90      | 90.23       |  |               |            |             |
| <b>Despropionyl <i>para</i>-fluorofentanyl</b> |               |            |             |  |               |            |             |
|                                                | <b>Set #1</b> |            |             |  | <b>Set #2</b> |            |             |
| <b>Trial no.</b>                               | <b>Low</b>    | <b>Med</b> | <b>High</b> |  | <b>Low</b>    | <b>Med</b> | <b>High</b> |
| 1                                              | 55310.89      | 410215.90  | 3346009.48  |  | 44611.95      | 298602.77  | 2379969.31  |
| 2                                              | 59539.77      | 417208.83  | 3306663.71  |  | 42323.78      | 262062.45  | 2461242.98  |
| 3                                              | 54462.41      | 429930.16  | 3259141.25  |  | 48160.70      | 302515.48  | 2219544.67  |
| Average                                        | 56437.69      | 419118.30  | 3303938.15  |  | 45032.14      | 287726.90  | 2353585.65  |
| Process Efficiency (%)                         | 79.79         | 68.65      | 71.24       |  |               |            |             |
| <b>(±)-<i>cis</i>-3-Methyl fentanyl</b>        |               |            |             |  |               |            |             |
|                                                | <b>Set #1</b> |            |             |  | <b>Set #2</b> |            |             |
| <b>Trial no.</b>                               | <b>Low</b>    | <b>Med</b> | <b>High</b> |  | <b>Low</b>    | <b>Med</b> | <b>High</b> |
| 1                                              | 24054.35      | 166202.47  | 1583431.31  |  | 20491.67      | 156986.46  | 1478382.82  |
| 2                                              | 27032.87      | 169935.48  | 1605989.18  |  | 21452.07      | 141056.37  | 1509950.96  |
| 3                                              | 28262.03      | 170303.84  | 1617468.23  |  | 23994.77      | 155435.24  | 1401345.31  |
| Average                                        | 26449.75      | 168813.93  | 1602296.24  |  | 21979.50      | 151159.36  | 1463226.36  |



|                                    |               |            |             |  |               |            |
|------------------------------------|---------------|------------|-------------|--|---------------|------------|
| Process Efficiency (%)             | 83.10         | 89.54      | 91.32       |  |               |            |
| <b>Butyryl/Isobutyryl Fentanyl</b> |               |            |             |  |               |            |
|                                    | <b>Set #1</b> |            |             |  | <b>Set #2</b> |            |
| <b>Trial no.</b>                   | <b>Low</b>    | <b>Med</b> | <b>High</b> |  | <b>Low</b>    | <b>Med</b> |
| 1                                  | 45422.09      | 314101.40  | 2930769.08  |  | 39780.73      | 286850.10  |
| 2                                  | 43811.81      | 330407.44  | 2863257.61  |  | 40474.67      | 250218.59  |
| 3                                  | 43617.99      | 318274.99  | 2892301.46  |  | 41938.47      | 284702.64  |
| Average                            | 44283.97      | 320927.94  | 2895442.71  |  | 40731.29      | 273923.77  |
| Process Efficiency (%)             | 91.98         | 85.35      | 89.63       |  |               |            |
| <b>Carfentanil</b>                 |               |            |             |  |               |            |
|                                    | <b>Set #1</b> |            |             |  | <b>Set #2</b> |            |
| <b>Trial no.</b>                   | <b>Low</b>    | <b>Med</b> | <b>High</b> |  | <b>Low</b>    | <b>Med</b> |
| 1                                  | 29581.26      | 190158.75  | 1361256.73  |  | 20082.97      | 141783.79  |
| 2                                  | 28035.22      | 185363.84  | 1327128.00  |  | 19522.51      | 125922.13  |
| 3                                  | 28947.85      | 186650.17  | 1340755.27  |  | 21596.45      | 150266.11  |
| Average                            | 28854.78      | 187390.92  | 1343046.67  |  | 20400.64      | 139324.01  |
| Process Efficiency (%)             | 70.70         | 74.35      | 87.26       |  |               |            |
| <b>para-Fluorobutyryl/FIBF</b>     |               |            |             |  |               |            |
|                                    | <b>Set #1</b> |            |             |  | <b>Set #2</b> |            |
| <b>Trial no.</b>                   | <b>Low</b>    | <b>Med</b> | <b>High</b> |  | <b>Low</b>    | <b>Med</b> |
| 1                                  | 54002.16      | 342912.34  | 2955695.73  |  | 40598.62      | 312539.77  |
| 2                                  | 56611.46      | 339053.46  | 2918068.58  |  | 39133.46      | 276976.56  |
| 3                                  | 58760.62      | 353647.81  | 2923275.93  |  | 46283.60      | 320551.42  |
| Average                            | 56458.08      | 345204.54  | 2932346.74  |  | 42005.23      | 303355.92  |
| Process Efficiency (%)             | 74.40         | 87.88      | 90.24       |  |               |            |
| <b>Sufentanil</b>                  |               |            |             |  |               |            |
|                                    | <b>Set #1</b> |            |             |  | <b>Set #2</b> |            |
| <b>Trial no.</b>                   | <b>Low</b>    | <b>Med</b> | <b>High</b> |  | <b>Low</b>    | <b>Med</b> |
| 1                                  | 21378.68      | 141092.61  | 1353710.93  |  | 16366.94      | 120199.93  |
| 2                                  | 23467.13      | 133429.58  | 1365799.90  |  | 15683.01      | 110473.97  |
| 3                                  | 21426.18      | 137804.06  | 1362923.38  |  | 19433.81      | 121634.57  |
| Average                            | 22090.66      | 137442.08  | 1360811.40  |  | 17161.25      | 117436.15  |
| Process Efficiency (%)             | 77.69         | 85.44      | 89.41       |  |               |            |
| <b>Valeryl Fentanyl</b>            |               |            |             |  |               |            |

|                        | <b>Set #1</b> |            |             |  | <b>Set #2</b> |            |             |
|------------------------|---------------|------------|-------------|--|---------------|------------|-------------|
| <b>Trial no.</b>       | <b>Low</b>    | <b>Med</b> | <b>High</b> |  | <b>Low</b>    | <b>Med</b> | <b>High</b> |
| 1                      | 59939.19      | 373667.31  | 3834026.52  |  | 51047.18      | 370795.17  | 3328155.43  |
| 2                      | 62192.36      | 419395.23  | 3638907.11  |  | 50457.26      | 327512.59  | 3497367.43  |
| 3                      | 60773.11      | 434846.52  | 3925964.13  |  | 58040.14      | 369396.01  | 3238100.13  |
| Average                | 60968.22      | 409303.02  | 3799632.58  |  | 53181.53      | 355901.26  | 3354541.00  |
| Process Efficiency (%) | 87.23         | 86.95      | 88.29       |  |               |            |             |

## Acquisition Method Info

**Method Name** fentanalogmeth.m  
**Method Path** D:\MassHunter\Methods\fentanalogmeth.m  
**Method Description** Fentanyl Analogs MRM

### Device List

HiP Sampler  
 Binary Pump  
 Column Comp.  
 QQQ

### MS QQQ Mass Spectrometer

**Ion Source** ESI **Tune File** atunes.TUNE.XML  
**Stop Mode** No Limit/As Pump **Stop Time (min)** 2.0  
**Time Filter** On **Time Filter Width (min)** 0.07  
**LC->Waste Pre Row** N/A **LC->Waste Post Row** N/A

### Time Segments

| Index | Start Time (min) | Scan Type  | Ion Mode | Div Valve | Delta EMV | Store | Cycle Time (ms) | Triggered ? | MRM Repeats |
|-------|------------------|------------|----------|-----------|-----------|-------|-----------------|-------------|-------------|
| 1     | 0.5              | DynamicMRM | ESI      | To MS     | 300       | Yes   | 500             | No          | 3           |

### Time Segment 1

### Scan Segments

| Cpd Name            | ISTD? | Prec Ion | MS1 Res         | Prod Ion | MS2 Res         | Frag (V) | CE (V) | Cell Acc (V) | Ret Time (min) | Ret Window | Polarity |
|---------------------|-------|----------|-----------------|----------|-----------------|----------|--------|--------------|----------------|------------|----------|
| 1-3-Methylfentanyl  | No    | 351.51   | Unit/Enh (6490) | 202.1    | Unit/Enh (6490) | 150      | 20     | 7            | 9.511          | 1          | Positive |
| 1-3-Methylfentanyl  | No    | 351.51   | Unit/Enh (6490) | 105      | Unit/Enh (6490) | 150      | 48     | 7            | 9.511          | 1          | Positive |
| 4ANPP               | No    | 281.4    | Unit/Enh (6490) | 105.1    | Unit/Enh (6490) | 116      | 36     | 7            | 9.39           | 1          | Positive |
| 4ANPP               | No    | 281.4    | Unit/Enh (6490) | 77.2     | Unit/Enh (6490) | 116      | 76     | 7            | 9.39           | 1          | Positive |
| 4ANPP               | No    | 281.4    | Unit/Enh (6490) | 51.3     | Unit/Enh (6490) | 116      | 124    | 7            | 9.39           | 1          | Positive |
| Acetyl Fent 4-meth  | No    | 337.5    | Unit/Enh (6490) | 119      | Unit/Enh (6490) | 136      | 36     | 7            | 9.224          | 1          | Positive |
| Acetyl Fent 4-meth  | No    | 337.5    | Unit/Enh (6490) | 91.1     | Unit/Enh (6490) | 136      | 72     | 7            | 9.224          | 1          | Positive |
| Acetyl Fentanyl     | No    | 323      | Unit/Enh (6490) | 188      | Unit/Enh (6490) | 141      | 20     | 7            | 8.8            | 1          | Positive |
| Acetyl Fentanyl     | No    | 323      | Unit/Enh (6490) | 105      | Unit/Enh (6490) | 141      | 40     | 7            | 8.8            | 1          | Positive |
| AcetylFentanyl-13C6 | Yes   | 329.4    | Unit/Enh (6490) | 105      | Unit/Enh (6490) | 136      | 44     | 7            | 8.864          | 1          | Positive |
| AcetylFentanyl-13C6 | Yes   | 329.4    | Unit/Enh (6490) | 77.1     | Unit/Enh (6490) | 136      | 96     | 7            | 8.864          | 1          | Positive |
| Acrylfentanyl       | No    | 335.5    | Unit/Enh (6490) | 105      | Unit/Enh (6490) | 141      | 44     | 7            | 9.229          | 1          | Positive |
| Acrylfentanyl       | No    | 335.5    | Unit/Enh (6490) | 77.1     | Unit/Enh (6490) | 141      | 92     | 7            | 9.229          | 1          | Positive |
| Acrylfentanyl       | No    | 335.5    | Unit/Enh (6490) | 51.2     | Unit/Enh (6490) | 141      | 140    | 7            | 9.229          | 1          | Positive |
| AH7921              | No    | 329      | Unit/Enh (6490) | 284      | Unit/Enh (6490) | 111      | 20     | 7            | 8.864          | 1          | Positive |
| AH7921              | No    | 329      | Unit/Enh (6490) | 95.1     | Unit/Enh (6490) | 111      | 36     | 7            | 8.864          | 1          | Positive |
| Alfentanil          | No    | 417.5    | Unit/Enh (6490) | 165      | Unit/Enh (6490) | 131      | 36     | 7            | 8.852          | 1          | Positive |
| Alfentanil          | No    | 417.5    | Unit/Enh (6490) | 99       | Unit/Enh (6490) | 131      | 40     | 7            | 8.852          | 1          | Positive |
| Alfentanil          | No    | 417.5    | Unit/Enh (6490) | 77.1     | Unit/Enh (6490) | 131      | 100    | 7            | 8.852          | 1          | Positive |
| Butyryl Fent/Isobut | No    | 351.2    | Unit/Enh (6490) | 188.1    | Unit/Enh (6490) | 146      | 24     | 7            | 9.5            | 1          | Positive |

# Acquisition Method Report

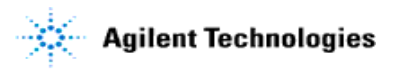

|                                  |    |       |                    |       |                    |     |    |   |       |   |          |
|----------------------------------|----|-------|--------------------|-------|--------------------|-----|----|---|-------|---|----------|
| yl<br>Butyl<br>Fent/Isobut<br>yl | No | 351.2 | Unit/Enh<br>(6490) | 105.1 | Unit/Enh<br>(6490) | 146 | 48 | 7 | 9.5   | 1 | Positive |
| yl<br>Butyl<br>norfentanyl       | No | 247.3 | Unit/Enh<br>(6490) | 94    | Unit/Enh<br>(6490) | 106 | 32 | 7 | 8.135 | 1 | Positive |
| yl<br>Butyl<br>norfentanyl       | No | 247.3 | Unit/Enh<br>(6490) | 84.1  | Unit/Enh<br>(6490) | 106 | 16 | 7 | 8.135 | 1 | Positive |

# Acquisition Method Report

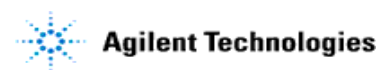

| Cpd Name                | ISTD? | Prec Ion | MS1 Res         | Prod Ion | MS2 Res         | Frag (V) | CE (V) | Cell Acc (V) | Ret Time (min) | Ret Window | Polarity |
|-------------------------|-------|----------|-----------------|----------|-----------------|----------|--------|--------------|----------------|------------|----------|
| Butyryl norfentanyl     | No    | 247.3    | Unit/Enh (6490) | 55.2     | Unit/Enh (6490) | 106      | 44     | 7            | 8.135          | 1          | Positive |
| Carfentanil             | No    | 395.21   | Unit/Enh (6490) | 113      | Unit/Enh (6490) | 131      | 36     | 7            | 9.455          | 1          | Positive |
| Carfentanil             | No    | 395.21   | Unit/Enh (6490) | 105      | Unit/Enh (6490) | 131      | 56     | 7            | 9.455          | 1          | Positive |
| Carfentanil             | No    | 395.21   | Unit/Enh (6490) | 77.1     | Unit/Enh (6490) | 131      | 112    | 7            | 9.455          | 1          | Positive |
| Desprop Fluorofent      | No    | 299.4    | Unit/Enh (6490) | 105      | Unit/Enh (6490) | 111      | 36     | 7            | 9.463          | 1          | Positive |
| Desprop Fluorofent      | No    | 299.4    | Unit/Enh (6490) | 77.1     | Unit/Enh (6490) | 111      | 88     | 7            | 9.463          | 1          | Positive |
| Desprop Fluorofent      | No    | 299.4    | Unit/Enh (6490) | 51.2     | Unit/Enh (6490) | 111      | 88     | 7            | 9.463          | 1          | Positive |
| Fentanyl                | No    | 337.5    | Unit/Enh (6490) | 188      | Unit/Enh (6490) | 131      | 20     | 7            | 9.224          | 1          | Positive |
| Fentanyl                | No    | 337.5    | Unit/Enh (6490) | 105      | Unit/Enh (6490) | 131      | 44     | 7            | 9.224          | 1          | Positive |
| Fentanyl-D5             | Yes   | 342.5    | Unit/Enh (6490) | 105      | Unit/Enh (6490) | 141      | 44     | 7            | 9.22           | 1          | Positive |
| Fentanyl-D5             | Yes   | 342.5    | Unit/Enh (6490) | 77.1     | Unit/Enh (6490) | 141      | 100    | 7            | 9.22           | 1          | Positive |
| Furanyl Fentanyl        | No    | 375.1    | Unit/Enh (6490) | 188.2    | Unit/Enh (6490) | 125      | 25     | 7            | 9.423          | 1          | Positive |
| Furanyl Fentanyl        | No    | 375.1    | Unit/Enh (6490) | 105      | Unit/Enh (6490) | 125      | 40     | 7            | 9.423          | 1          | Positive |
| Furanyl norfentanyl     | No    | 271.4    | Unit/Enh (6490) | 95       | Unit/Enh (6490) | 106      | 44     | 7            | 7.983          | 1          | Positive |
| Furanyl norfentanyl     | No    | 271.4    | Unit/Enh (6490) | 84.1     | Unit/Enh (6490) | 106      | 16     | 7            | 7.983          | 1          | Positive |
| Norfentanyl I           | No    | 233.4    | Unit/Enh (6490) | 94       | Unit/Enh (6490) | 106      | 36     | 7            | 7.77           | 1          | Positive |
| Norfentanyl I           | No    | 233.4    | Unit/Enh (6490) | 84.1     | Unit/Enh (6490) | 106      | 16     | 7            | 7.77           | 1          | Positive |
| Norfentanyl I           | No    | 233.4    | Unit/Enh (6490) | 55.2     | Unit/Enh (6490) | 106      | 44     | 7            | 7.77           | 1          | Positive |
| Norfentanyl I-D5        | Yes   | 238.4    | Unit/Enh (6490) | 84.1     | Unit/Enh (6490) | 106      | 16     | 7            | 7.651          | 1          | Positive |
| Norfentanyl I-D5        | Yes   | 238.4    | Unit/Enh (6490) | 55.2     | Unit/Enh (6490) | 106      | 44     | 7            | 7.651          | 1          | Positive |
| para-Fluorobutyryl/FIBF | No    | 369.24   | Unit/Enh (6490) | 188.1    | Unit/Enh (6490) | 141      | 24     | 7            | 9.523          | 1          | Positive |
| para-Fluorobutyryl/FIBF | No    | 369.24   | Unit/Enh (6490) | 105.1    | Unit/Enh (6490) | 141      | 44     | 7            | 9.523          | 1          | Positive |
| para-Fluorobutyryl/FIBF | No    | 369.24   | Unit/Enh (6490) | 77.1     | Unit/Enh (6490) | 141      | 108    | 7            | 9.523          | 1          | Positive |
| para-Methoxyfentanyl    | No    | 367.6    | Unit/Enh (6490) | 105      | Unit/Enh (6490) | 136      | 44     | 7            | 9.357          | 1          | Positive |
| para-Methoxyfentanyl    | No    | 367.6    | Unit/Enh (6490) | 77.1     | Unit/Enh (6490) | 136      | 108    | 7            | 9.357          | 1          | Positive |
| para-Methoxyfentanyl    | No    | 367.6    | Unit/Enh (6490) | 51.2     | Unit/Enh (6490) | 136      | 160    | 7            | 9.357          | 1          | Positive |
| Remifentanyl            | No    | 377.46   | Unit/Enh (6490) | 345      | Unit/Enh (6490) | 25       | 15     | 7            | 8.456          | 1          | Positive |
| Remifentanyl            | No    | 377.46   | Unit/Enh (6490) | 317      | Unit/Enh (6490) | 25       | 15     | 7            | 8.456          | 1          | Positive |
| Remifentanyl metab.     | No    | 363.4    | Unit/Enh (6490) | 81.1     | Unit/Enh (6490) | 111      | 44     | 7            | 8.048          | 1          | Positive |
| Remifentanyl metab.     | No    | 363.4    | Unit/Enh (6490) | 53.2     | Unit/Enh (6490) | 111      | 72     | 7            | 8.048          | 1          | Positive |
| Sufentanil              | No    | 387.56   | Unit/Enh (6490) | 238.18   | Unit/Enh (6490) | 121      | 36     | 7            | 9.713          | 1          | Positive |
| Sufentanil              | No    | 387.56   | Unit/Enh (6490) | 132      | Unit/Enh (6490) | 121      | 36     | 7            | 9.713          | 1          | Positive |
| Sufentanil              | No    | 387.56   | Unit/Enh (6490) | 111      | Unit/Enh (6490) | 121      | 44     | 7            | 9.713          | 1          | Positive |
| U-47700                 | No    | 329      | Unit/Enh (6490) | 204      | Unit/Enh (6490) | 120      | 25     | 7            | 9.011          | 1          | Positive |
| U-47700                 | No    | 329      | Unit/Enh (6490) | 81       | Unit/Enh (6490) | 120      | 36     | 7            | 9.011          | 1          | Positive |
| Valeryl Fentanyl        | No    | 365.5    | Unit/Enh (6490) | 105      | Unit/Enh (6490) | 136      | 44     | 7            | 9.5            | 1          | Positive |
| Valeryl Fentanyl        | No    | 365.5    | Unit/Enh (6490) | 77.1     | Unit/Enh (6490) | 136      | 112    | 7            | 9.5            | 1          | Positive |
| Valeryl Fentanyl        | No    | 365.5    | Unit/Enh (6490) | 51.2     | Unit/Enh (6490) | 136      | 164    | 7            | 9.5            | 1          | Positive |

**Scan Parameters**

|                 |                  |
|-----------------|------------------|
| <b>Data Stg</b> | <b>Threshold</b> |
| Centroid        | 0                |

**Source Parameters**

| Parameter        | Value (+) | Value (-) |
|------------------|-----------|-----------|
| Gas Temp (°C)    | 350       | 350       |
| Gas Flow (l/min) | 12        | 12        |
| Nebulizer (psi)  | 60        | 60        |
| Capillary (V)    | 4000      | 4000      |

**Chromatograms**

| Chrom Type | Label | Offset | Y-Range  |
|------------|-------|--------|----------|
| TIC        | TIC   | 0      | 10000000 |

**Instrument Curves**

Actual

**HiP Sampler**

**Model: G1367B**

**Name:**
**Auxiliary**

|                          |              |
|--------------------------|--------------|
| Draw Speed               | 200.0 µL/min |
| Eject Speed              | 200.0 µL/min |
| Draw Position Offset     | 1.0 mm       |
| Wait Time After Drawing  | 2.0 s        |
| Sample Flush Out Factor  | 20.0         |
| Vial/Well bottom sensing | No           |

**Injection**

|                      |                            |
|----------------------|----------------------------|
| Injection Mode       | Injection with needle wash |
| Injection Volume     | 10.00 µL                   |
| <b>Needle Wash</b>   |                            |
| Needle Wash Location | Flush Port                 |
| Wash Time            | 35.0 s                     |

**High throughput**

|                                  |    |
|----------------------------------|----|
| Automatic Delay Volume Reduction | No |
| <b>Overlapped Injection</b>      |    |
| Enable Overlapped Injection      | No |

**Valve Switching**

|                            |    |
|----------------------------|----|
| Valve Movements            | 1  |
| <b>Valve Switch Time 1</b> |    |
| Switch Time 1 Enabled      | No |
| <b>Valve Switch Time 2</b> |    |
| Switch Time 2 Enabled      | No |
| <b>Valve Switch Time 3</b> |    |
| Switch Time 3 Enabled      | No |
| <b>Valve Switch Time 4</b> |    |
| Switch Time 4 Enabled      | No |

**Stop Time**

|               |                  |
|---------------|------------------|
| Stoptime Mode | As pump/No limit |
|---------------|------------------|

**Post Time**

|               |     |
|---------------|-----|
| Posttime Mode | Off |
|---------------|-----|

# Acquisition Method Report

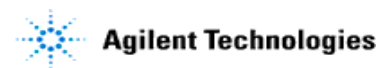

Name:

Binary Pump

Model:

G1312A

Flow 0.400 mL/min  
 Low Pressure Limit 0.00 bar  
 High Pressure Limit 400.00 bar  
 Maximum Flow Gradient 100.000 mL/min<sup>2</sup>

**Stroke A**

Automatic Stroke Calculation A Yes

**Stroke B**

Automatic Stroke Calculation B Yes

**Compress A**

Compressibility Mode A Compressibility Value Set  
 Compressibility A 50 10e-6/bar

**Compress B**

Compressibility Mode B Compressibility Value Set  
 Compressibility B 115 10e-6/bar

**Stop Time**

Stoptime Mode Time set  
 Stoptime 13.50 min

**Post Time**

Posttime Mode Off

**Solvent Composition**

|   | Channel | Name 1                      | Name 2                      | Selected | Used | Percent |
|---|---------|-----------------------------|-----------------------------|----------|------|---------|
| 1 | A       | amm. formate, formic, water | amm. formate, formic, water | Ch. 2    | Yes  | 90.0 %  |
| 2 | B       | formic, ACN                 | formic, ACN                 | Ch. 2    | Yes  | 10.0 %  |

**Timetable**

|   | Time      | A      | B      | Flow         | Pressure   |
|---|-----------|--------|--------|--------------|------------|
| 1 | 2.00 min  | 90.0 % | 10.0 % | 0.400 mL/min | 400.00 bar |
| 2 | 8.00 min  | 10.0 % | 90.0 % | 0.400 mL/min | 400.00 bar |
| 3 | 8.50 min  | 10.0 % | 90.0 % | 0.400 mL/min | 400.00 bar |
| 4 | 8.60 min  | 90.0 % | 10.0 % | 0.400 mL/min | 400.00 bar |
| 5 | 12.00 min | 90.0 % | 10.0 % | 0.400 mL/min | 400.00 bar |

Column Comp.

Model:

G1316A

Name:

Valve Position Port 1 -> 6

**Left Temperature Control**

Temperature Control Mode Temperature Set  
 Temperature 40.00 °C

**Enable Analysis Left Temperature**

Enable Analysis Left Temperature On Yes  
 Enable Analysis Left Temperature Value 0.8 °C

**Right Temperature Control**

Right temperature Control Mode Not Controlled

**Enable Analysis Right Temperature**

Enable Analysis Right Temperature On Yes  
 Enable Analysis Right Temperature Value 0.8 °C

**Stop Time**

Stoptime Mode As pump/injector

**Post Time**

Posttime Mode Off
